# Supplementary material
Source: PubMed Central journal article supplement (PMC5559660)
Supplement: NIHMS883286-supplement-supplement_1.pdf [file NIHMS883286-supplement-supplement_1.pdf]

eFigure Title

**Acute ischemic stroke hospitalization rates/10,000 hospitalizations by age and Sex, 1995-1996–011-2012**

Contents of Online-only Supplemental Material

Supplemental eTable 1 **Definitions of Risk Factors (ICD-9-CM)**

Supplemental eFigure **Acute Ischemic Stroke hospitalization Rates/10,000 Hospitalizations by Age and Sex, 1995-1996—2011-2012**

Supplemental eTable 2 **Ischemic Stroke Hospitalization Rates/10,000 hospitalizations by Age and Sex, 1995-96 – 2011-12**

Supplemental eTable 3 **Discharge Destination for Acute Ischemic Stroke Admissions, National Inpatient Sample (NIS) 2003-2012**

Supplemental eTable 4 **Discharge Destination for Intracerebral Hemorrhage Admissions, National Inpatient Sample (NIS) 2003-2012**

Supplemental eTable 5 **Discharge Destination for Subarachnoid Hemorrhage Admissions, National Inpatient Sample (NIS) 2003-2012**

Supplemental eTable 1 **Definitions of Risk Factors (ICD-9-CM)**

| Risk Factor                | ICD-9-CM Codes                                                          |
|----------------------------|-------------------------------------------------------------------------|
| Hypertension               | 401.1, 401.9                                                            |
| Lipid disorders            | 272.0, 272.1, 272.2, 272.3, 272.4                                       |
| Diabetes                   | 249, 250                                                                |
| Tobacco use                | 305.1                                                                   |
| Obesity                    | 278.00, 278.01                                                          |
| Other drug abuse           | 292, 304, 305.2, 305.3, 305.4, 305.5, 305.6, 305.7, 305.8, 305.9, 648.3 |
| Atrial fibrillation        | 427.3                                                                   |
| Arteriovenous malformation | 747.81                                                                  |

Supplemental eFigure Acute Ischemic Stroke hospitalization Rates/10,000 Hospitalizations by Age and Sex, 1995-1996—2011-2012

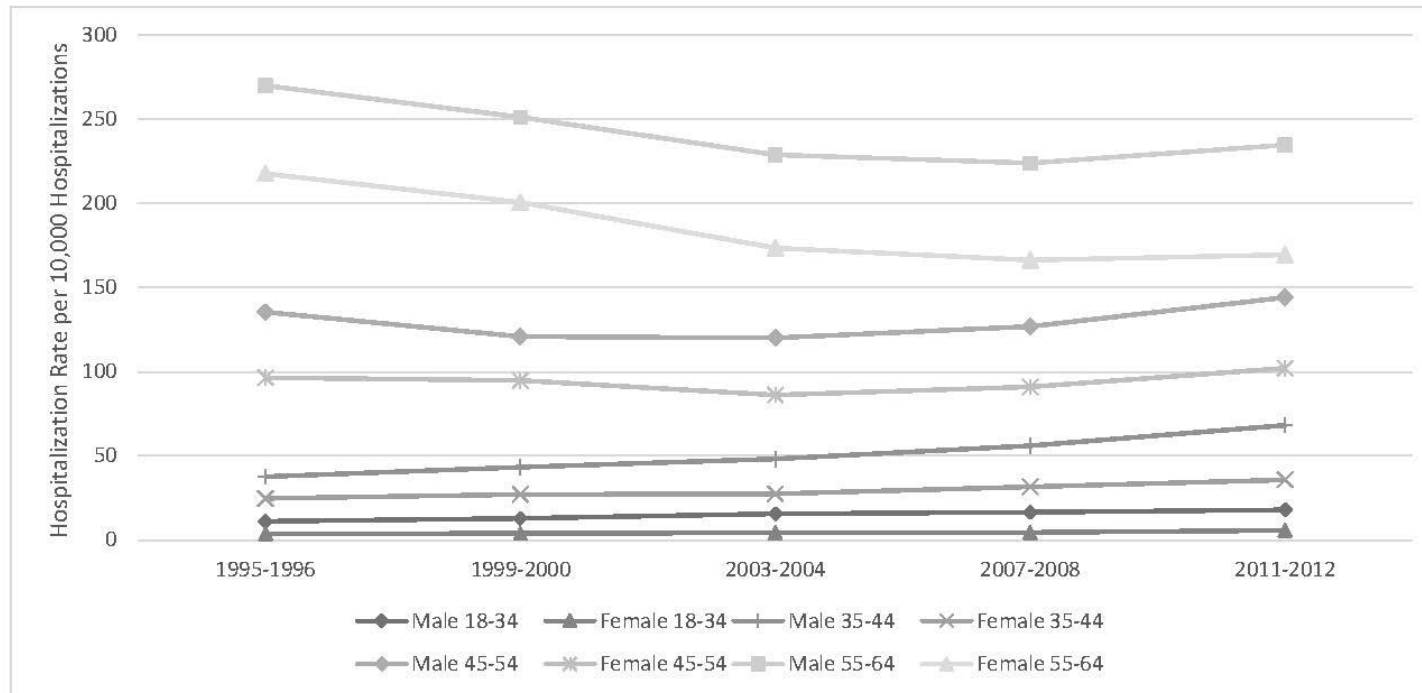

Supplemental eTable 2 **Ischemic Stroke Hospitalization Rates/10,000 hospitalizations by Age and Sex, 1995-96 – 2011-12<sup>a</sup>**

|              | 1995-1996 | 1999-2000 | 2003-2004 | 2007-2008 | 2011-2012 |
|--------------|-----------|-----------|-----------|-----------|-----------|
| Male 18-34   | 11.2      | 13.0      | 15.6      | 16.5      | 18        |
| Female 18-34 | 3.8       | 4.0       | 4.4       | 4.5       | 5.8       |
| Male 35-44   | 37.7      | 43.4      | 48.2      | 56        | 68.2      |
| Female 35-44 | 24.8      | 27.2      | 27.5      | 31.6      | 35.8      |
| Male 45-54   | 135.4     | 120.9     | 120.1     | 126.9     | 144.1     |
| Female 45-54 | 96.4      | 94.8      | 86.2      | 91.1      | 102.1     |
| Male 55-64   | 269.9     | 251.2     | 228.8     | 223.9     | 234.6     |
| Female 55-64 | 217.6     | 200.6     | 173.4     | 166.3     | 169.5     |

<sup>a</sup> Data for eFigure

**Supplemental eTable 3 Discharge Destination for Acute Ischemic Stroke Admissions, National Inpatient Sample (NIS) 2003-2012**

| <b>Discharge destination</b>    | 2003-04<br>% (S.E) | 2005-06<br>% (S.E) | 2007-08<br>% (S.E) | 2009-10<br>% (S.E) | 2011-12<br>% (S.E) | p-value for trend |
|---------------------------------|--------------------|--------------------|--------------------|--------------------|--------------------|-------------------|
| <b>Age 18-34 Years old</b>      |                    |                    |                    |                    |                    |                   |
| Home/home health care           | 69.9 (1.1)         | 70.6 (1.2)         | 69.3 (1.1)         | 71.0 (1.1)         | 68.1 (1.1)         | 0.34              |
| Transfer to short term hospital | 5.3 (0.5)          | 5.3 (0.5)          | 6.6 (0.7)          | 6.0 (0.6)          | 6.3 (0.6)          | 0.14              |
| Transfer to other <sup>a</sup>  | 18.7 (1.0)         | 19.2 (1.1)         | 19.1 (1.0)         | 18.0 (0.9)         | 20.3 (1.0)         | 0.55              |
| Died in hospital                | 3.7 (0.5)          | 2.8 (0.4)          | 2.5 (0.4)          | 3.0 (0.4)          | 2.6 (0.3)          | 0.12              |
| <b>Age 35-44 Years old</b>      |                    |                    |                    |                    |                    |                   |
| Home/home health care           | 70.2 (0.7)         | 70.0 (0.7)         | 69.3 (0.7)         | 70.5 (0.8)         | 70.8 (0.6)         | 0.42              |
| Transfer to short term hospital | 4.3 (0.3)          | 4.1 (0.3)          | 4.7 (0.4)          | 4.8 (0.4)          | 4.6 (0.3)          | 0.21              |
| Transfer to other <sup>a</sup>  | 20.3 (0.7)         | 20.7 (0.6)         | 21.0 (0.6)         | 20.2 (0.7)         | 20.0 (0.6)         | 0.58              |
| Died in hospital                | 2.9 (0.2)          | 2.8 (0.2)          | 2.7 (0.2)          | 2.5 (0.2)          | 2.2 (0.2)          | <b>0.01</b>       |
| <b>Age 45-54 Years old</b>      |                    |                    |                    |                    |                    |                   |
| Home/home health care           | 70.5 (0.5)         | 70.2 (0.5)         | 70.3 (0.5)         | 69.5 (0.5)         | 69.3 (0.4)         | <b>0.03</b>       |
| Transfer to short term hospital | 3.1 (0.2)          | 3.5 (0.2)          | 4.0 (0.2)          | 3.9 (0.2)          | 3.5 (0.2)          | <b>0.04</b>       |
| Transfer to other <sup>a</sup>  | 21.5 (0.4)         | 22.1 (0.4)         | 21.6 (0.4)         | 22.4 (0.5)         | 23.3 (0.4)         | <b>0.004</b>      |
| Died in hospital                | 3.0 (0.1)          | 2.5 (0.1)          | 2.4 (0.1)          | 2.3 (0.1)          | 2.2 (0.1)          | <b>&lt;0.001</b>  |
| <b>Age 55-64 Years old</b>      |                    |                    |                    |                    |                    |                   |
| Home/home health care           | 70.5 (0.4)         | 71.0 (0.4)         | 70.8 (0.4)         | 69.2 (0.4)         | 68.0 (0.3)         | <b>&lt;0.001</b>  |
| Transfer to short term hospital | 2.7 (0.1)          | 2.8 (0.1)          | 3.3 (0.2)          | 3.3 (0.2)          | 3.1 (0.1)          | <b>&lt;0.001</b>  |
| Transfer to other <sup>a</sup>  | 22.8 (0.4)         | 22.7 (0.4)         | 22.6 (0.4)         | 24.0 (0.4)         | 25.6 (0.3)         | <b>&lt;0.001</b>  |
| Died in hospital                | 2.8 (0.1)          | 2.7 (0.1)          | 2.3 (0.1)          | 2.4 (0.1)          | 2.2 (0.1)          | <b>&lt;0.001</b>  |

<sup>a</sup> Includes skilled nursing facility, intermediate care facility, long-term care facility, or rehabilitation facility

**Supplemental eTable 4 Discharge Destination for Intracerebral Hemorrhage Admissions, National Inpatient Sample (NIS) 2003-2012**

| <b>Discharge destination</b>    | 2003-04<br>% (S.E) | 2005-06<br>% (S.E) | 2007-08<br>% (S.E) | 2009-10<br>% (S.E) | 2011-12<br>% (S.E) | p-value for trend |
|---------------------------------|--------------------|--------------------|--------------------|--------------------|--------------------|-------------------|
| <b>Age 18-34 Years old</b>      |                    |                    |                    |                    |                    |                   |
| Home/home health care           | 46.5 (2.3)         | 50.3 (2.4)         | 53.9 (2.3)         | 54.6 (2.1)         | 50.7 (2.1)         | 0.08              |
| Transfer to short term hospital | 8.2 (1.3)          | 7.2 (1.1)          | 8.6 (1.3)          | 7.7 (1.3)          | 6.2 (1.1)          | 0.28              |
| Transfer to other <sup>a</sup>  | 20.6 (2.0)         | 23.2 (2.3)         | 20.2 (1.8)         | 21.0 (1.9)         | 25.4 (2.0)         | 0.18              |
| Died in hospital                | 22.3 (1.8)         | 18.1 (1.6)         | 16.2 (1.6)         | 16.2 (1.6)         | 16.7 (1.5)         | <b>0.009</b>      |
| <b>Age 35-44 Years old</b>      |                    |                    |                    |                    |                    |                   |
| Home/home health care           | 40.2 (1.4)         | 40.5 (1.5)         | 41.9 (1.6)         | 40.2 (1.5)         | 39.9 (1.5)         | 0.84              |
| Transfer to short term hospital | 6.7 (0.8)          | 6.3 (0.8)          | 7.0 (0.9)          | 6.4 (0.9)          | 6.1 (0.8)          | 0.64              |
| Transfer to other <sup>a</sup>  | 27.1 (1.3)         | 29.0 (1.3)         | 29.9 (1.5)         | 32.2 (1.7)         | 33.6 (1.4)         | <b>0.002</b>      |
| Died in hospital                | 24.0 (1.3)         | 23.0 (1.3)         | 20.0 (1.1)         | 19.4 (1.1)         | 19.4 (1.2)         | <b>0.002</b>      |
| <b>Age 45-54 Years old</b>      |                    |                    |                    |                    |                    |                   |
| Home/home health care           | 34.1 (1.0)         | 35.5 (1.2)         | 37.9 (1.0)         | 35.5 (1.1)         | 35.3 (0.9)         | 0.44              |
| Transfer to short term hospital | 5.4 (0.5)          | 4.6 (0.4)          | 5.0 (0.7)          | 5.5 (0.5)          | 4.7 (0.5)          | 0.70              |
| Transfer to other <sup>a</sup>  | 29.4 (0.9)         | 32.3 (1.0)         | 34.2 (1.0)         | 36.0 (1.2)         | 37.2 (0.9)         | <b>&lt;0.001</b>  |
| Died in hospital                | 29.1 (0.8)         | 26.6 (0.8)         | 22.1 (0.8)         | 22.3 (0.7)         | 21.6 (0.7)         | <b>&lt;0.001</b>  |
| <b>Age 55-64 Years old</b>      |                    |                    |                    |                    |                    |                   |
| Home/home health care           | 31.6 (0.8)         | 32.2 (0.8)         | 33.3 (0.9)         | 32.8 (1.0)         | 32.2 (0.7)         | 0.46              |
| Transfer to short term hospital | 4.9 (0.4)          | 5.1 (0.4)          | 6.0 (0.7)          | 4.5 (0.4)          | 4.5 (0.4)          | 0.26              |
| Transfer to other <sup>a</sup>  | 34.3 (0.9)         | 36.3 (0.9)         | 36.4 (1.0)         | 38.4 (1.1)         | 39.8 (0.9)         | <b>&lt;0.001</b>  |
| Died in hospital                | 27.8 (0.7)         | 25.8 (0.8)         | 23.8 (0.7)         | 23.4 (0.7)         | 22.9 (0.6)         | <b>&lt;0.001</b>  |

<sup>a</sup> Includes skilled nursing facility, intermediate care facility, long-term care facility, or rehabilitation facility

**Supplemental eTable 5 Discharge Destination for Subarachnoid Hemorrhage Admissions, National Inpatient Sample (NIS) 2003-2012**

| <b>Discharge destination</b>    | 2003-04<br>% (S.E) | 2005-06<br>% (S.E) | 2007-08<br>% (S.E) | 2009-10<br>% (S.E) | 2011-12<br>% (S.E) | p-value for trend |
|---------------------------------|--------------------|--------------------|--------------------|--------------------|--------------------|-------------------|
| <b>Age 18-34 Years old</b>      |                    |                    |                    |                    |                    |                   |
| Home/home health care           | 61.7 (2.0)         | 55.9 (2.1)         | 61.7 (2.1)         | 58.0 (2.0)         | 64.3 (2.0)         | 0.27              |
| Transfer to short term hospital | 10.2 (1.4)         | 12.7 (1.5)         | 10.7 (1.5)         | 8.4 (1.2)          | 6.4 (1.1)          | <b>0.007</b>      |
| Transfer to other <sup>a</sup>  | 13.3 (1.2)         | 14.5 (1.5)         | 16.4 (1.5)         | 18.5 (1.7)         | 16.5 (1.4)         | <b>0.03</b>       |
| Died in hospital                | 13.6 (1.3)         | 15.9 (1.4)         | 10.2 (1.1)         | 12.8 (1.3)         | 11.2 (1.3)         | 0.09              |
| <b>Age 35-44 Years old</b>      |                    |                    |                    |                    |                    |                   |
| Home/home health care           | 54.0 (1.6)         | 54.2 (1.7)         | 59.2 (1.6)         | 58.0 (1.7)         | 59.3 (1.5)         | <b>0.004</b>      |
| Transfer to short term hospital | 10.2 (1.1)         | 11.9 (1.3)         | 8.8 (1.1)          | 8.3 (1.1)          | 8.5 (1.1)          | 0.08              |
| Transfer to other <sup>a</sup>  | 18.5 (1.3)         | 18.0 (1.1)         | 16.9 (1.1)         | 18.0 (1.3)         | 17.4 (1.2)         | 0.53              |
| Died in hospital                | 16.2 (0.9)         | 14.9 (1.0)         | 14.4 (1.1)         | 14.7 (1.1)         | 13.7 (0.9)         | 0.06              |
| <b>Age 45-54 Years old</b>      |                    |                    |                    |                    |                    |                   |
| Home/home health care           | 47.6 (1.4)         | 48.5 (1.3)         | 52.6 (1.3)         | 51.4 (1.5)         | 53.3 (1.3)         | <b>&lt;0.001</b>  |
| Transfer to short term hospital | 10.7 (1.0)         | 11.6 (1.1)         | 11.9 (1.1)         | 9.5 (0.9)          | 7.3 (0.7)          | <b>0.001</b>      |
| Transfer to other <sup>a</sup>  | 20.5 (1.0)         | 20.9 (1.0)         | 18.1 (1.0)         | 21.6 (1.2)         | 22.9 (1.0)         | 0.08              |
| Died in hospital                | 20.4 (0.9)         | 18.4 (0.8)         | 16.7 (0.9)         | 16.7 (0.8)         | 15.9 (0.8)         | <b>&lt;0.001</b>  |
| <b>Age 55-64 Years old</b>      |                    |                    |                    |                    |                    |                   |
| Home/home health care           | 39.7 (1.4)         | 40.4 (1.3)         | 42.4 (1.4)         | 44.5 (1.5)         | 45.1 (1.1)         | <b>&lt;0.001</b>  |
| Transfer to short term hospital | 10.9 (1.0)         | 10.6 (0.9)         | 11.9 (1.3)         | 9.0 (0.9)          | 7.3 (0.7)          | <b>0.002</b>      |
| Transfer to other <sup>a</sup>  | 26.8 (1.3)         | 26.6 (1.2)         | 25.9 (1.3)         | 26.2 (1.2)         | 29.7 (1.0)         | 0.17              |
| Died in hospital                | 21.4 (1.0)         | 22.0 (0.9)         | 19.4 (1.0)         | 20.0 (0.9)         | 17.7 (0.9)         | <b>0.001</b>      |

<sup>a</sup> Includes skilled nursing facility, intermediate care facility, long-term care facility, or rehabilitation facility
